# Supplementary material
Source: PubMed Central journal article supplement (PMC5828170)
Supplement: NIHMS943140-supplement-figures.pdf [file NIHMS943140-supplement-figures.pdf]

# Supplemental Figures

G.D. Thomas, et al.

Table S1. CyTOF antibodies.

| <b>Antigen</b> | <b>Clone</b> | <b>Metal conjugate</b> | <b>Manufacturer</b> | <b>Conjugation</b> |
|----------------|--------------|------------------------|---------------------|--------------------|
| CD62L          | DREG-56      | 141Pr                  | Biologend           | In-house           |
| CD11a          | HI111        | 142Nd                  | DVS                 | DVS                |
| CD123          | 6H6          | 143Nd                  | DVS                 | DVS                |
| CD80           | 2D10.4       | 144Nd                  | Biologend           | In-house           |
| CD81           | 5A6          | 145Nd                  | DVS                 | DVS                |
| CD64           | 10.1         | 146Nd                  | DVS                 | DVS                |
| CD91           | A2MR-a2      | 147Sm                  | eBioscience         | In-house           |
| CD300e         | UP-H2        | 148Nd                  | Abcam               | In-house           |
| CD66a-c-e      | ASL-32       | 149Sm                  | DVS                 | DVS                |
| CD43           | 84-3C1       | 150Nd                  | DVS                 | DVS                |
| EDG-8          | 282503       | 151Eu                  | R&D                 | In-house           |
| CD19           | HB19         | 152Sm                  | Biologend           | In-house           |
| CD3            | UCHT1        | 152Sm                  | Biologend           | In-house           |
| CD66b          | 80H3         | 152Sm                  | DVS                 | DVS                |
| CD192          | K036C2       | 153Eu                  | DVS                 | DVS                |
| CD163          | GHI/61       | 154Sm                  | DVS                 | DVS                |
| CD36           | 5-271        | 155Gd                  | DVS                 | DVS                |
| CD86           | IT2.2        | 156Gd                  | DVS                 | DVS                |
| HLA-DR         | L234         | 158Gd                  | Biologend           | In-house           |
| CD11c          | Bu15         | 159Tb                  | DVS                 | DVS                |
| CD14           | M5E2         | 160Gd                  | DVS                 | DVS                |
| CD204          | -            | 161Dy                  | AbD Serotec         | In-house           |
| CD93           | R139         | 163Dy                  | eBioscience         | In-house           |
| CD169          | 7-239        | 164Dy                  | AbD Serotec         | In-house           |
| CD16           | 3G8          | 165Ho                  | DVS                 | DVS                |
| CD74           | LN2          | 166Er                  | Biologend           | In-house           |
| CX3CR1         | 2A9-1        | 167Er                  | Biologend           | In-house           |
| CD244          | C1.7         | 168Er                  | Biologend           | In-house           |
| TLR4           | HTA125       | 169Tm                  | Biologend           | In-house           |
| Tim-3          | F38-2E2      | 170Er                  | Biologend           | In-house           |
| CD9            | SN4 C3-3A2   | 171Yb                  | DVS                 | DVS                |
| CD354          | TREM-26      | 172Yb                  | DVS                 | DVS                |
| CD40           | 5C3          | 173Yb                  | Biologend           | In-house           |
| CD274          | 29E.2A3      | 175Lu                  | DVS                 | DVS                |
| CD1c           | L161         | 176Yb                  | Biologend           | In-house           |
| CD61           | VI-PL2       | 209Bi                  | DVS                 | DVS                |

Table S1. Antibodies and heavy metal conjugates used in CyTOF study

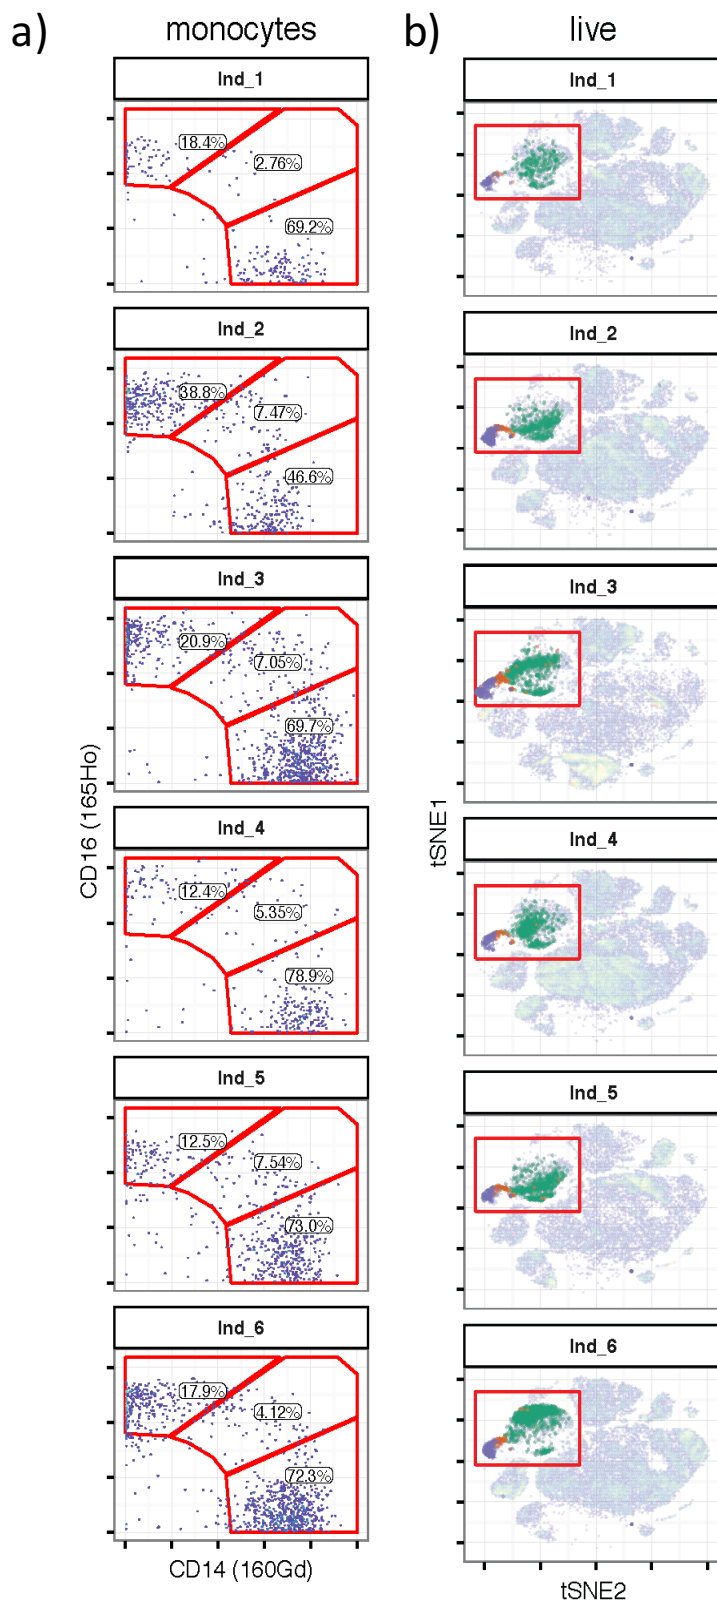

Figure S1. a) Monocyte subset frequencies in each individual used for CyTOF analysis. b) viSNE overlay showing the location of classical (green), intermediate (orange) and nonclassical (blue) monocytes superimposed on all PBMCs.

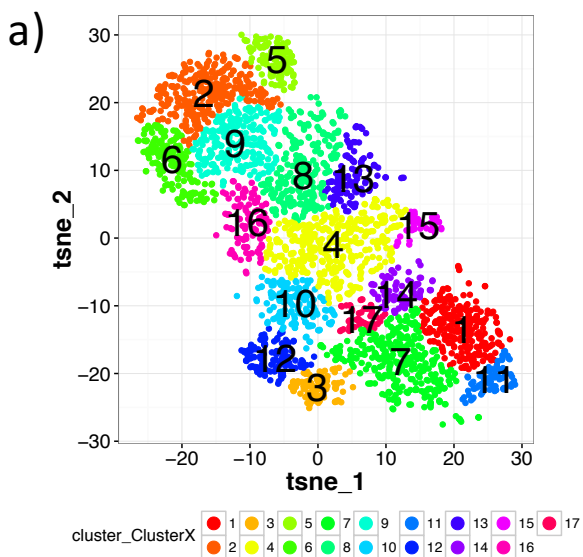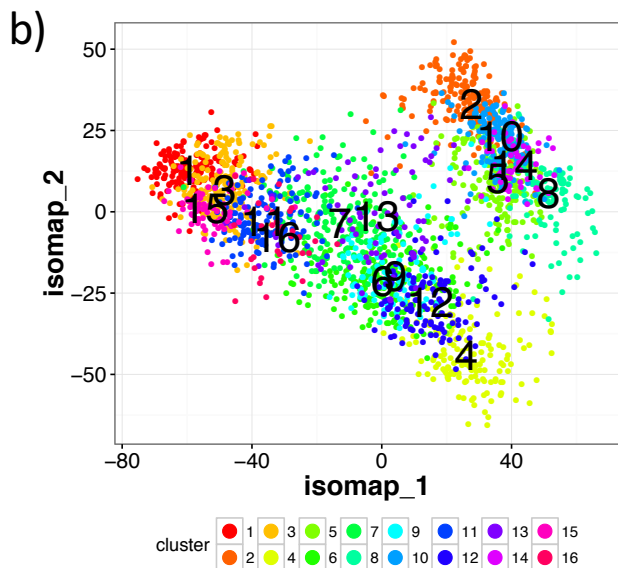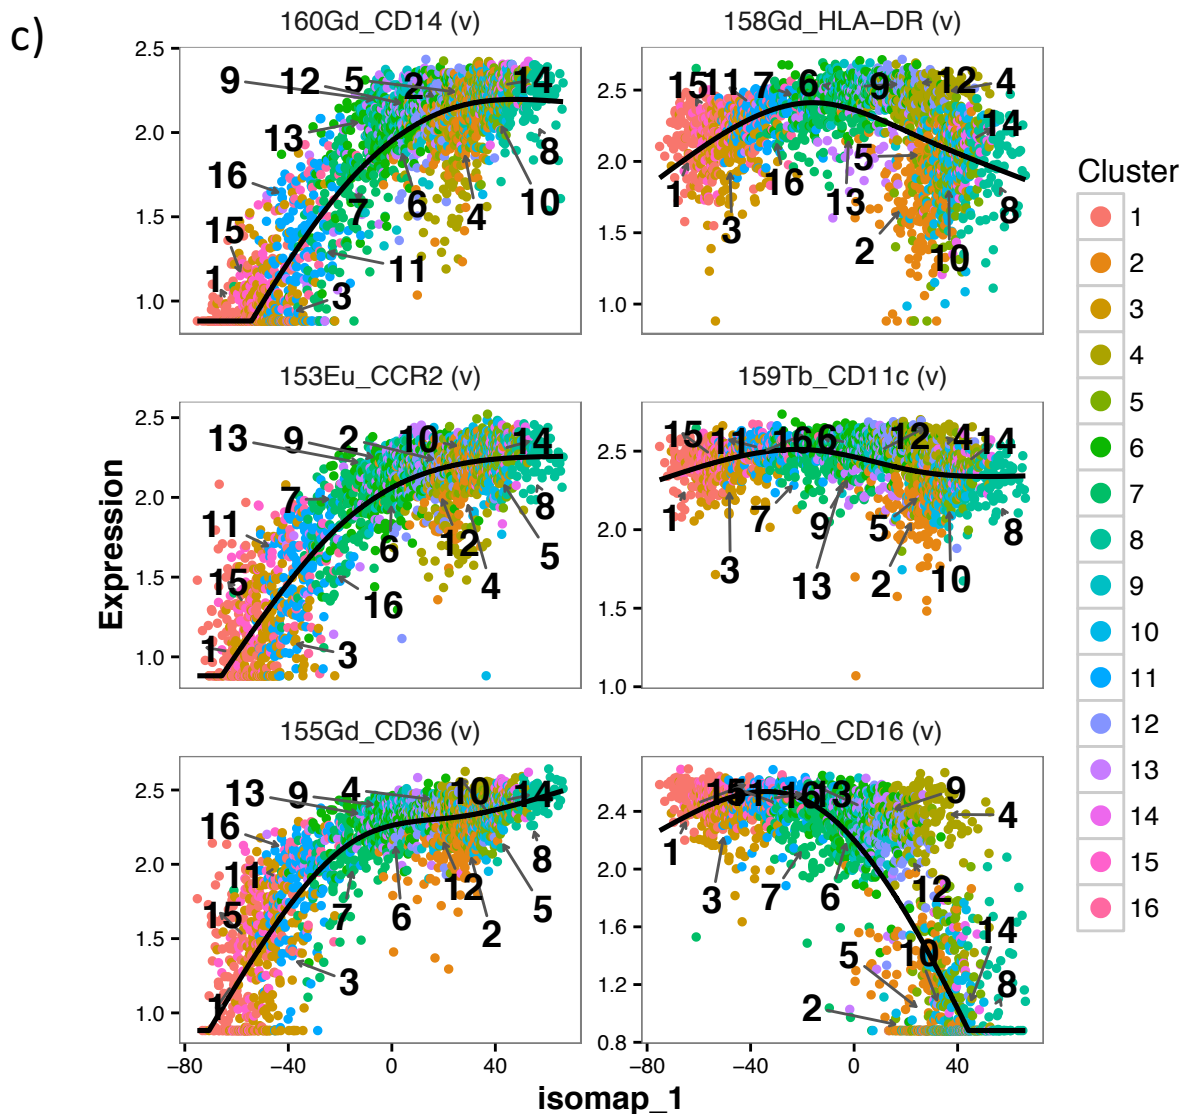

Figure S2 a) ClusterX partitioning of the monocyte viSNE analysis in Figure 2a. b) Isometric mapping (ISOMAP) analysis of ClusterX . c) Expression pattern of most informative cell surface markers plotted against ISOMAP axis 1 showing the positions of the ClusterX clusters.

CAD low

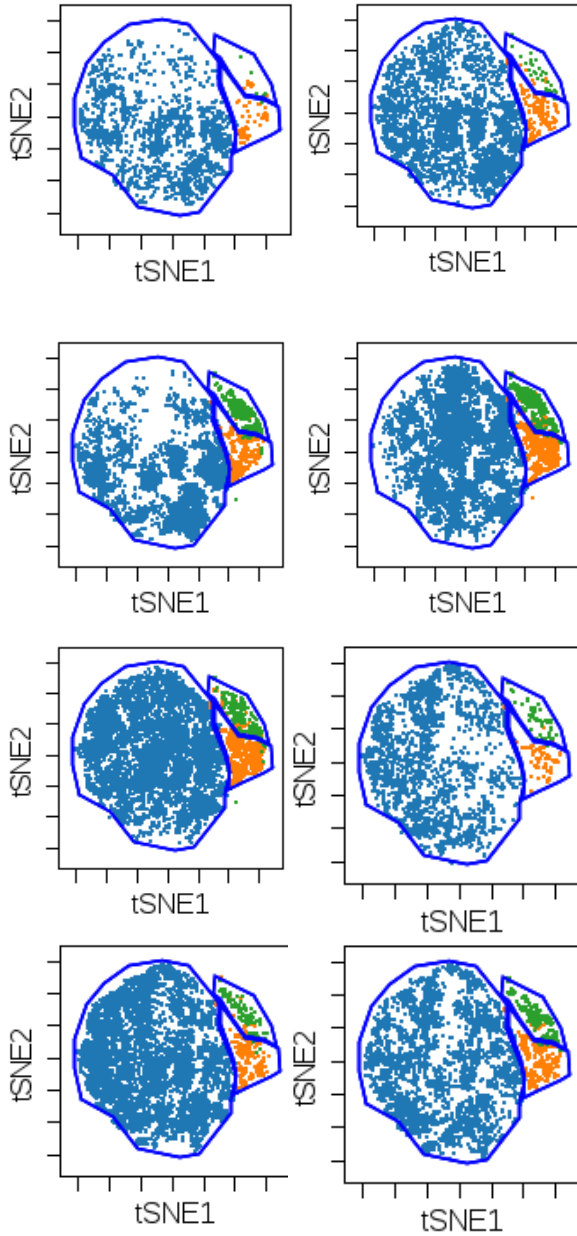

CAD high

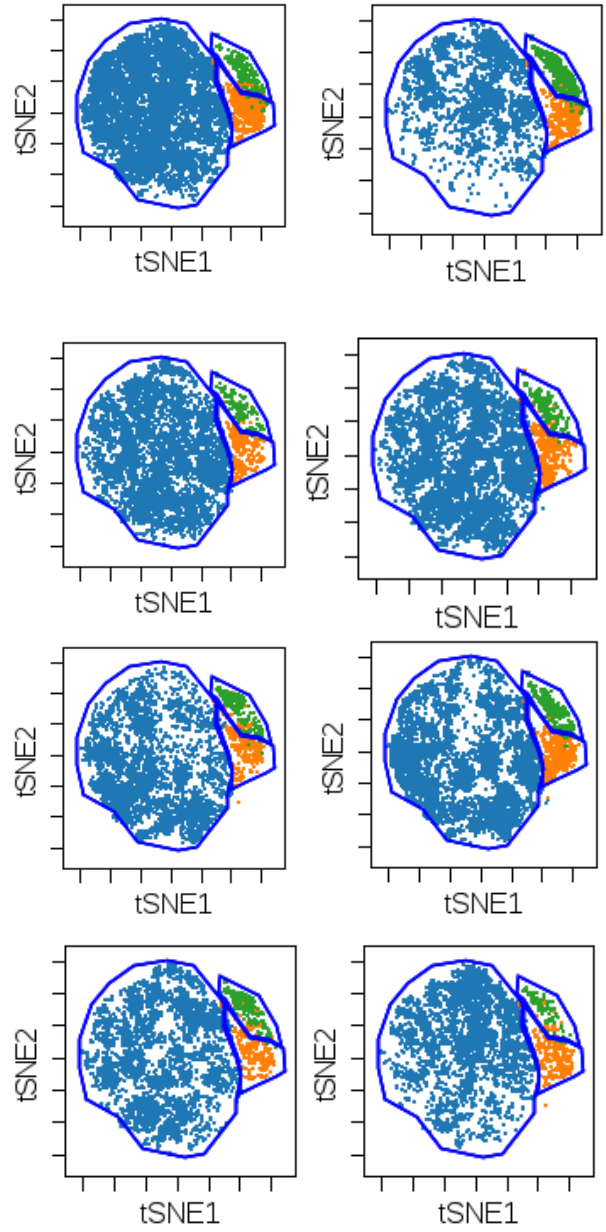

Figure S3. Classical (blue), intermediate (orange) and nonclassical (green) monocyte subsets in CAD low and CAD high individuals displayed on a viSNE analysis of all monocytes.

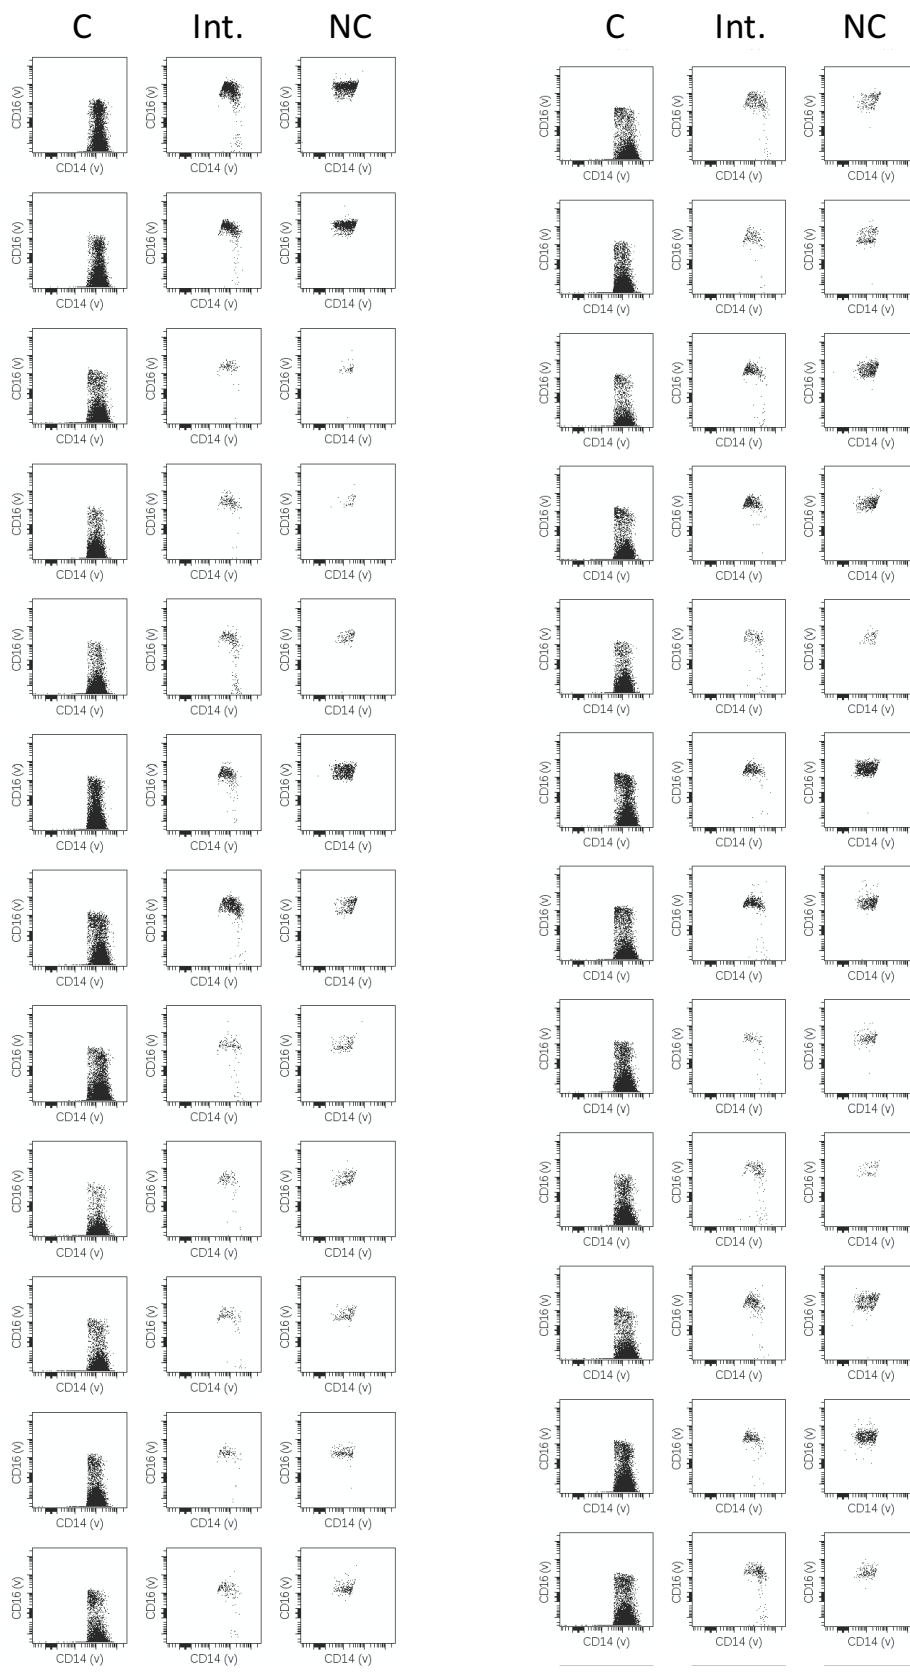

Figure S4. CD16 expression on Classical (left, C), intermediate (center, Int.) and nonclassical (right, NC) monocyte subsets defined by viSNE from CAD samples shown on CD14 vs CD16 biaxial plot.
